# Supplementary material
Source: PubMed Central journal article supplement (PMC9020749)
Supplement: NIHMS1722178-supplement-1.pdf [file NIHMS1722178-supplement-1.pdf]

## Supplemental Tables

Table S1, Related to Figure 1. Demographics table.

|                                     | High fermented food diet (n=18) | High fiber diet (n=18) |
|-------------------------------------|---------------------------------|------------------------|
| <b>Demographics (% of diet arm)</b> |                                 |                        |
| Female                              | 13 (72%)                        | 12 (67%)               |
| Male                                | 5 (28%)                         | 6 (33%)                |
| Non-hispanic                        | 18 (100%)                       | 18 (100%)              |
| Hispanic                            | 0 (0%)                          | 0 (0%)                 |
| Asian                               | 4 (22%)                         | 2 (11%)                |
| White                               | 14 (78%)                        | 16 (89%)               |
| Married/Partnered                   | 9 (50%)                         | 11 (61%)               |
| Divorced                            | 7 (39%)                         | 1 (6%)                 |
| Single/Never married                | 2 (11%)                         | 6 (33%)                |
| Some college                        | 2 (11%)                         | 0 (0%)                 |
| College graduate                    | 5 (28%)                         | 6 (33%)                |
| Some post-graduate school           | 2 (11%)                         | 3 (17%)                |
| Post-graduate degree                | 9 (50%)                         | 9 (50%)                |
| Working full-time                   | 14 (78%)                        | 15 (83%)               |
| Working part-time                   | 1 (6%)                          | 2 (11%)                |
| Unemployed                          | 0 (0%)                          | 1 (6%)                 |
| Retired                             | 3 (17%)                         | 0 (0%)                 |
| Smokers                             | 0 (0%)                          | 0 (0%)                 |
| Non-smokers                         | 18 (100%)                       | 16 (89%)               |
| <b>Anthropometrics (average±SD)</b> |                                 |                        |
| HEIGHT (m)                          | 1.7 ± 0.1                       | 1.7 ± 0.1              |
| WEIGHT (kg)                         | 70 ± 12                         | 73 ± 14                |
| BMI                                 | 25 ± 4                          | 25 ± 3                 |
| WAIST (cm)                          | 35 ± 4                          | 35 ± 4                 |
| Systolic BP                         | 121 ± 14                        | 120 ± 13               |
| Diastolic BP                        | 77 ± 7                          | 76 ± 6                 |
| <b>Blood Values (average±SD)</b>    |                                 |                        |
| Glucose (mg/dL)                     | 95 ± 9                          | 95 ± 14                |
| Insulin (uU/mL)                     | 9.9 ± 3.8                       | 9.4 ± 2.9              |
| Triglycerides (mg/dL)               | 112 ± 52                        | 108 ± 57               |
| Total Cholesterol (mg/dL)           | 215 ± 27                        | 200 ± 24               |
| HDL Cholesterol (mg/dL)             | 65 ± 17                         | 61 ± 20                |
| Calculated LDL Chol (mg/dL)         | 128 ± 26                        | 117 ± 27               |

Table S2, Related to Figure 1. Number of participants per data type (% of all participants).

|                                                            | Time (weeks) |           |           |           |           |             |           |           |           |           |
|------------------------------------------------------------|--------------|-----------|-----------|-----------|-----------|-------------|-----------|-----------|-----------|-----------|
|                                                            | Baseline     |           |           | Ramp      |           | Maintenance |           |           | Choice    |           |
|                                                            | -3           | -2        | 0         | 2         | 4         | 6           | 8         | 10        | 12        | 14        |
| <b>Food logs</b>                                           | 0 (0%)       | 36 (100%) | 36 (100%) | 36 (100%) | 36 (100%) | 36 (100%)   | 36 (100%) | 36 (100%) | 36 (100%) | 36 (100%) |
| <b>16S ASVs</b>                                            | 0 (0%)       | 32 (89%)  | 28 (78%)  | 28 (78%)  | 31 (86%)  | 33 (92%)    | 33 (92%)  | 33 (92%)  | 32 (89%)  | 31 (86%)  |
| <b>Metagenomics</b>                                        | 0 (0%)       | 27 (75%)  | 30 (83%)  | 0 (0%)    | 0 (0%)    | 0 (0%)      | 26 (72%)  | 27 (75%)  | 0 (0%)    | 0 (0%)    |
| <b>Proteomics</b>                                          | 0 (0%)       | 27 (75%)  | 27 (75%)  | 27 (75%)  | 0 (0%)    | 0 (0%)      | 27 (75%)  | 27 (75%)  | 0 (0%)    | 0 (0%)    |
| <b>SCFAs</b>                                               | 0 (0%)       | 36 (100%) | 36 (100%) | 0 (0%)    | 0 (0%)    | 0 (0%)      | 36 (100%) | 36 (100%) | 0 (0%)    | 0 (0%)    |
| <b>Inflammatory cytokines</b>                              | 35 (97%)     | 0 (0%)    | 35 (97%)  | 0 (0%)    | 0 (0%)    | 33 (92%)    | 35 (97%)  | 35 (97%)  | 0 (0%)    | 0 (0%)    |
| <b>Endogenous cell signaling</b>                           | 35 (97%)     | 0 (0%)    | 30 (83%)  | 0 (0%)    | 0 (0%)    | 28 (78%)    | 34 (94%)  | 33 (92%)  | 0 (0%)    | 0 (0%)    |
| <b>Cell signaling capacity</b>                             | 36 (100%)    | 0 (0%)    | 36 (100%) | 0 (0%)    | 0 (0%)    | 0 (0%)      | 36 (100%) | 36 (100%) | 0 (0%)    | 0 (0%)    |
| <b>Serum Metabolomics (% high-fermented food diet arm)</b> | 17 (94%)     | 0 (0%)    | 1 (6%)    | 0 (0%)    | 0 (0%)    | 0 (0%)      | 0 (0%)    | 18 (100%) | 0 (0%)    | 0 (0%)    |

Table S3, Related to Figure 1. Nutrient data from participant diets.

A) High-fiber diet arm nutrient intake

| <b>Nutrient</b>                                    | <b>Baseline<br/>(average±SD)</b> | <b>End of<br/>Maintenance<br/>(average±SD)</b> | <b>adjusted q-<br/>value</b> |
|----------------------------------------------------|----------------------------------|------------------------------------------------|------------------------------|
| Magnesium (mg)                                     | 341.2+/-104.8                    | 462.4+/-150.7                                  | <b>4.59E-04</b>              |
| Potassium (mg)                                     | 2726.4+/-<br>549.1               | 3377+/-944.3                                   | <b>4.59E-04</b>              |
| Vitamin C (ascorbic acid) (mg)                     | 77.3+/-54.9                      | 166+/-118                                      | <b>4.59E-04</b>              |
| Vitamin K (phylloquinone) (mcg)                    | 166.9+/-106.2                    | 308.1+/-188.6                                  | <b>4.59E-04</b>              |
| Total Dietary Fiber (g)                            | 22+/-7.4                         | 43.3+/-15                                      | <b>2.49E-03</b>              |
| Insoluble Dietary Fiber (g)                        | 15.7+/-5.6                       | 33.1+/-11.9                                    | <b>2.86E-03</b>              |
| Sodium (mg)                                        | 2989.7+/-<br>691.4               | 2603.1+/-1011.5                                | <b>2.86E-03</b>              |
| Animal Protein (g)                                 | 49.1+/-17                        | 32.9+/-15.4                                    | <b>3.67E-03</b>              |
| Beta-Carotene (provitamin A carotenoid) (mcg)      | 4574.8+/-<br>3743.2              | 6532.1+/-4729.9                                | <b>5.94E-03</b>              |
| Total Sugars (g)                                   | 79.7+/-28.8                      | 97.6+/-35.8                                    | <b>6.14E-03</b>              |
| Vegetable Protein (g)                              | 29.8+/-6.4                       | 40.9+/-14.2                                    | <b>7.77E-03</b>              |
| Calcium (mg)                                       | 949.9+/-286                      | 1026.7+/-275.5                                 | <b>7.92E-03</b>              |
| Total Carbohydrate (g)                             | 224+/-58.1                       | 248.1+/-63.3                                   | <b>8.11E-03</b>              |
| Lutein + Zeaxanthin (mcg)                          | 3580.9+/-<br>4969.5              | 4590.6+/-3312.1                                | <b>1.10E-02</b>              |
| Iron (mg)                                          | 13.7+/-4.6                       | 19+/-5.6                                       | <b>1.13E-02</b>              |
| Energy (kcal)                                      | 1880.4+/-<br>366.2               | 1952.9+/-462.4                                 | <b>1.16E-02</b>              |
| Alpha-Carotene (provitamin A carotenoid) (mcg)     | 808.2+/-923.5                    | 1009.6+/-1353                                  | <b>1.17E-02</b>              |
| Soluble Dietary Fiber (g)                          | 6.3+/-2.4                        | 10.1+/-4.8                                     | <b>1.17E-02</b>              |
| Added Sugars (by Total Sugars) (g)                 | 36.7+/-23.9                      | 37.8+/-25.3                                    | >.05                         |
| Beta-Cryptoxanthin (provitamin A carotenoid) (mcg) | 354.4+/-728.1                    | 296.1+/-348.3                                  | >.05                         |
| Cholesterol (mg)                                   | 224.9+/-61.8                     | 196.3+/-131.5                                  | >.05                         |
| Lycopene (mcg)                                     | 3992.5+/-<br>4108.2              | 3720.7+/-4969.1                                | >.05                         |
| Pectins (g)                                        | 2.8+/-1.3                        | 5.8+/-2.8                                      | >.05                         |
| Refined Grains (ounce equivalents)                 | 4.8+/-2.5                        | 2.9+/-1.1                                      | >.05                         |
| Total Fat (g)                                      | 71+/-17.7                        | 77.5+/-25.9                                    | >.05                         |
| Total Grains (ounce equivalents)                   | 7.4+/-3                          | 6+/-2.2                                        | >.05                         |
| Total Monounsaturated Fatty Acids (MUFA) (g)       | 24.5+/-6.6                       | 27.9+/-11.6                                    | >.05                         |
| Total Polyunsaturated Fatty Acids (PUFA) (g)       | 16.4+/-5.2                       | 19.7+/-6.6                                     | >.05                         |
| Total Protein (g)                                  | 78.9+/-18.6                      | 73.9+/-20.1                                    | >.05                         |
| Total Saturated Fatty Acids (SFA) (g)              | 23.8+/-7.4                       | 23.2+/-10.7                                    | >.05                         |
| Whole Grains (ounce equivalents)                   | 2.6+/-3.6                        | 3.1+/-2                                        | >.05                         |

B) High-fermented diet arm nutrient intake

| <b>Nutrient</b>                                    | <b>Baseline<br/>(average±SD)</b> | <b>End of<br/>Maintenance<br/>(average±SD)</b> | <b>adjusted q-<br/>value</b> |
|----------------------------------------------------|----------------------------------|------------------------------------------------|------------------------------|
| Animal Protein (g)                                 | 45.4+/-18.9                      | 58.3+/-20.1                                    | <b>1.49E-02</b>              |
| Added Sugars (by Total Sugars) (g)                 | 37.7+/-17.5                      | 50+/-19.1                                      | > .05                        |
| Alpha-Carotene (provitamin A carotenoid) (mcg)     | 632.3+/-785.3                    | 456.4+/-566                                    | > .05                        |
| Beta-Carotene (provitamin A carotenoid) (mcg)      | 4876.1+/-<br>3673.7              | 4465.6+/-2331.8                                | > .05                        |
| Beta-Cryptoxanthin (provitamin A carotenoid) (mcg) | 383.4+/-737.4                    | 345.3+/-684.8                                  | > .05                        |
| Calcium (mg)                                       | 783.7+/-253.5                    | 927.5+/-283.8                                  | > .05                        |
| Cholesterol (mg)                                   | 238.5+/-134.8                    | 252.7+/-128.2                                  | > .05                        |
| Energy (kcal)                                      | 1801.1+/-<br>437.9               | 1656.8+/-292.9                                 | > .05                        |
| Insoluble Dietary Fiber (g)                        | 13.9+/-5.1                       | 14.2+/-7.1                                     | > .05                        |
| Iron (mg)                                          | 11.6+/-2.4                       | 10.8+/-2.9                                     | > .05                        |
| Lutein + Zeaxanthin (mcg)                          | 2281.9+/-<br>1873.4              | 3868.5+/-3240                                  | > .05                        |
| Lycopene (mcg)                                     | 2072.3+/-<br>2152.5              | 1976.1+/-3023.9                                | > .05                        |
| Magnesium (mg)                                     | 306.9+/-99.1                     | 320.2+/-98.2                                   | > .05                        |
| Pectins (g)                                        | 2.9+/-1                          | 3.4+/-1.5                                      | > .05                        |
| Potassium (mg)                                     | 2602.6+/-<br>618.3               | 2822.8+/-803.9                                 | > .05                        |
| Refined Grains (ounce equivalents)                 | 4.5+/-2.5                        | 2.5+/-1.7                                      | > .05                        |
| Sodium (mg)                                        | 2534.6+/-<br>798.2               | 2532.8+/-557.2                                 | > .05                        |
| Soluble Dietary Fiber (g)                          | 6.7+/-2.4                        | 6.2+/-2.7                                      | > .05                        |
| Total Carbohydrate (g)                             | 205.3+/-54.3                     | 188.6+/-46.9                                   | > .05                        |
| Total Dietary Fiber (g)                            | 21.3+/-7.3                       | 20.6+/-9.5                                     | > .05                        |
| Total Fat (g)                                      | 72.3+/-20.5                      | 64.2+/-18                                      | > .05                        |
| Total Grains (ounce equivalents)                   | 6.1+/-2                          | 4+/-1.6                                        | > .05                        |
| Total Monounsaturated Fatty Acids (MUFA) (g)       | 27+/-7.4                         | 23.4+/-6.6                                     | > .05                        |
| Total Polyunsaturated Fatty Acids (PUFA) (g)       | 17.4+/-6.4                       | 14.1+/-6.9                                     | > .05                        |
| Total Protein (g)                                  | 74.1+/-21                        | 81.2+/-18.2                                    | > .05                        |
| Total Saturated Fatty Acids (SFA) (g)              | 21.9+/-8.4                       | 21.1+/-7.5                                     | > .05                        |
| Total Sugars (g)                                   | 78.7+/-27.4                      | 93.2+/-28.3                                    | > .05                        |
| Vegetable Protein (g)                              | 28.7+/-9.1                       | 22.9+/-9.1                                     | > .05                        |
| Vitamin C (ascorbic acid) (mg)                     | 92+/-60.2                        | 107.1+/-51.7                                   | > .05                        |
| Vitamin K (phylloquinone) (mcg)                    | 150+/-84.9                       | 215.4+/-145.3                                  | > .05                        |
| Whole Grains (ounce equivalents)                   | 1.6+/-1.6                        | 1.5+/-1                                        | > .05                        |

Table S7, Related to Figure 4. ZIBR coefficients for High-fiber diet arm inflammation clusters.

| Comparison        | Phylogenetic assignment    |                     |                    | Joint model      |          | Beta regression model |                |             |                | Logarithmic model |                |             |                |
|-------------------|----------------------------|---------------------|--------------------|------------------|----------|-----------------------|----------------|-------------|----------------|-------------------|----------------|-------------|----------------|
|                   |                            |                     |                    | Adjusted p-value |          | Group                 |                | Baseline    |                | Group             |                | Baseline    |                |
|                   | Family                     | Genus               | Species            | Group            | Baseline | Coefficient           | Adjusted p-val | Coefficient | Adjusted p-val | Coefficient       | Adjusted p-val | Coefficient | Adjusted p-val |
| High v<br>Low i   | <i>Lachnospiraceae</i>     | <i>Coproccus</i>    | UA                 | <b>0.01</b>      | 0.07     | 0.31                  | 0.82           | 0.38        | 1.00           | 3.09              | <b>0.01</b>    | 2720.24     | 0.05           |
|                   | <i>Ruminococcaceae</i>     | <i>Oscillospira</i> | UA                 | 0.08             | 0.72     | -44.88                | 1.00           | 105.10      | 0.45           | 2.46              | <b>0.04</b>    | 413.64      | 0.59           |
|                   | <i>Ruminococcaceae</i>     | <i>Ruminococcus</i> | UA                 | 0.11             | 0.25     | 0.03                  | 1.00           | -10.74      | 0.92           | 1.56              | <b>0.04</b>    | 264.09      | 0.16           |
|                   | <i>Lachnospiraceae</i>     | <i>Anaerostipes</i> | UA                 | <b>0.01</b>      | 0.35     | -0.19                 | 0.74           | -19.88      | 0.63           | 1.22              | 0.59           | 320.80      | 0.28           |
| High v<br>Low ii  | <i>Verrucomicrobiaceae</i> | <i>Akkermansia</i>  | <i>muciniphila</i> | 0.20             | 1.00     | -1.35                 | <b>0.04</b>    | 0.26        | 1.00           | -6.03             | 0.40           | -2.71       | 1.00           |
| Low i v<br>Low ii | <i>Lachnospiraceae</i>     | UA                  | UA                 | 1.00             | 0.17     | -2.75                 | <b>0.00</b>    | 69.55       | 0.34           | 0.26              | 1.00           | 191.17      | 0.16           |

Note: UA = Unassigned taxa, significant p-values bolded.

ZIBR coefficients on the tip glomeration for fiber inflammation groups. Beta-regression model refers to the change in relative abundance of taxa. Logarithmic model refers to presence/absence of taxa. A significant coefficient for the grouping variable indicates a significant difference between the inflammation groups indicated in the comparison column. Baseline coefficients indicate a difference in the taxonomic relative abundance or presence/absence at the baseline timepoint (Week 0). Taxa with significant baseline coefficients were filtered out to focus on the significant differences induced by the dietary intervention.
