# Supplementary material
Source: PubMed Central journal article supplement (PMC9020749)
Supplement: NIHMS1722178-supplement-9.pdf [file NIHMS1722178-supplement-9.pdf]

Figure S4.

Significance

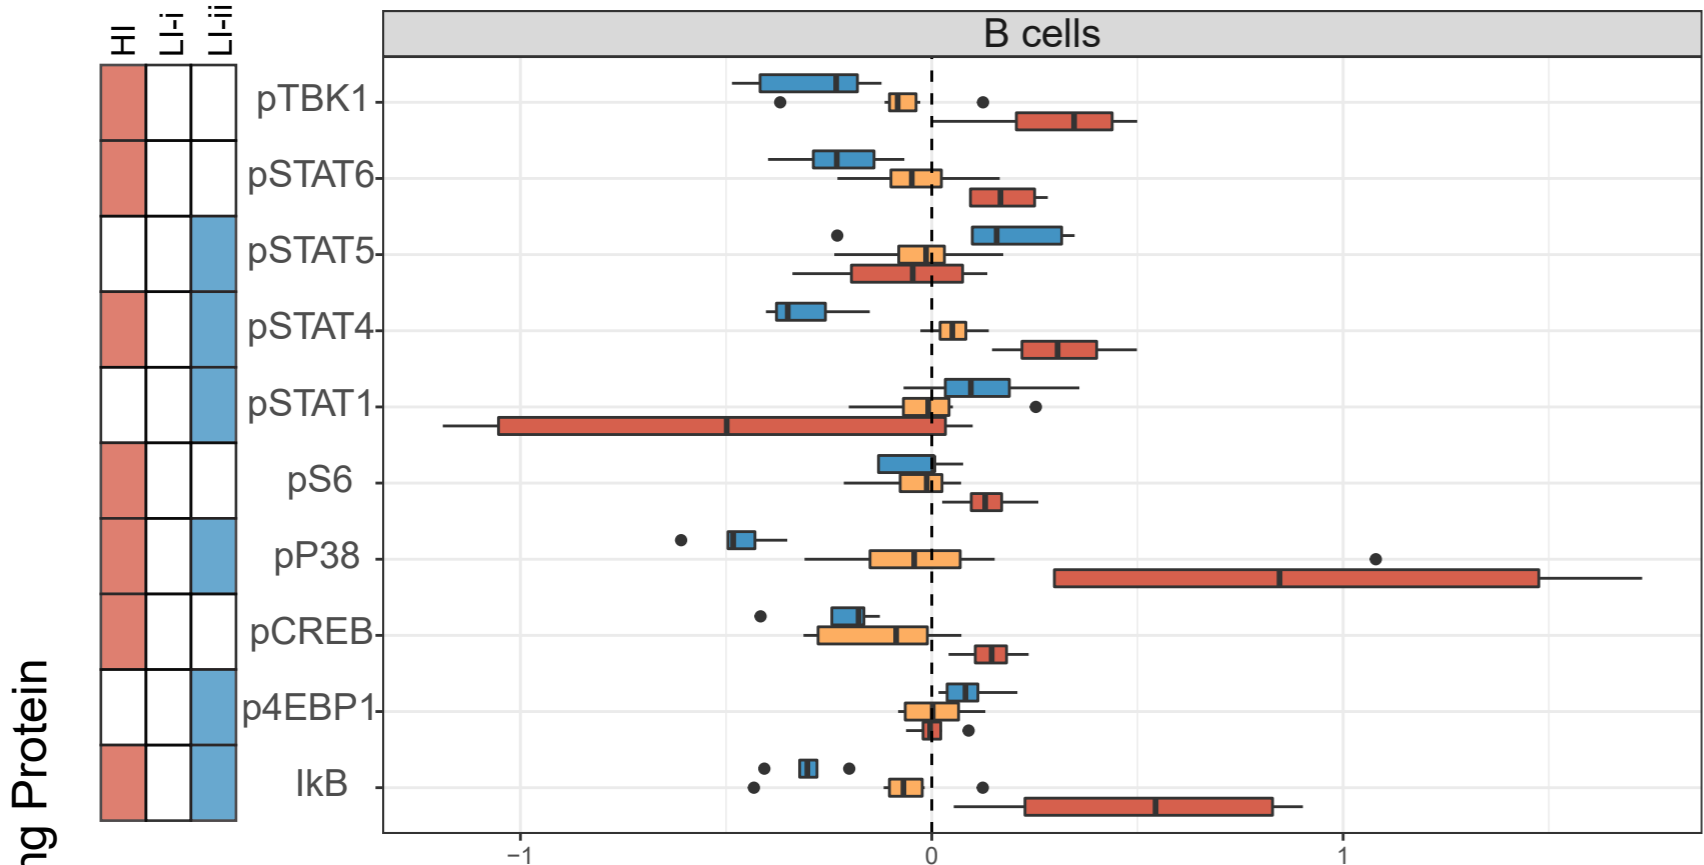

Significance

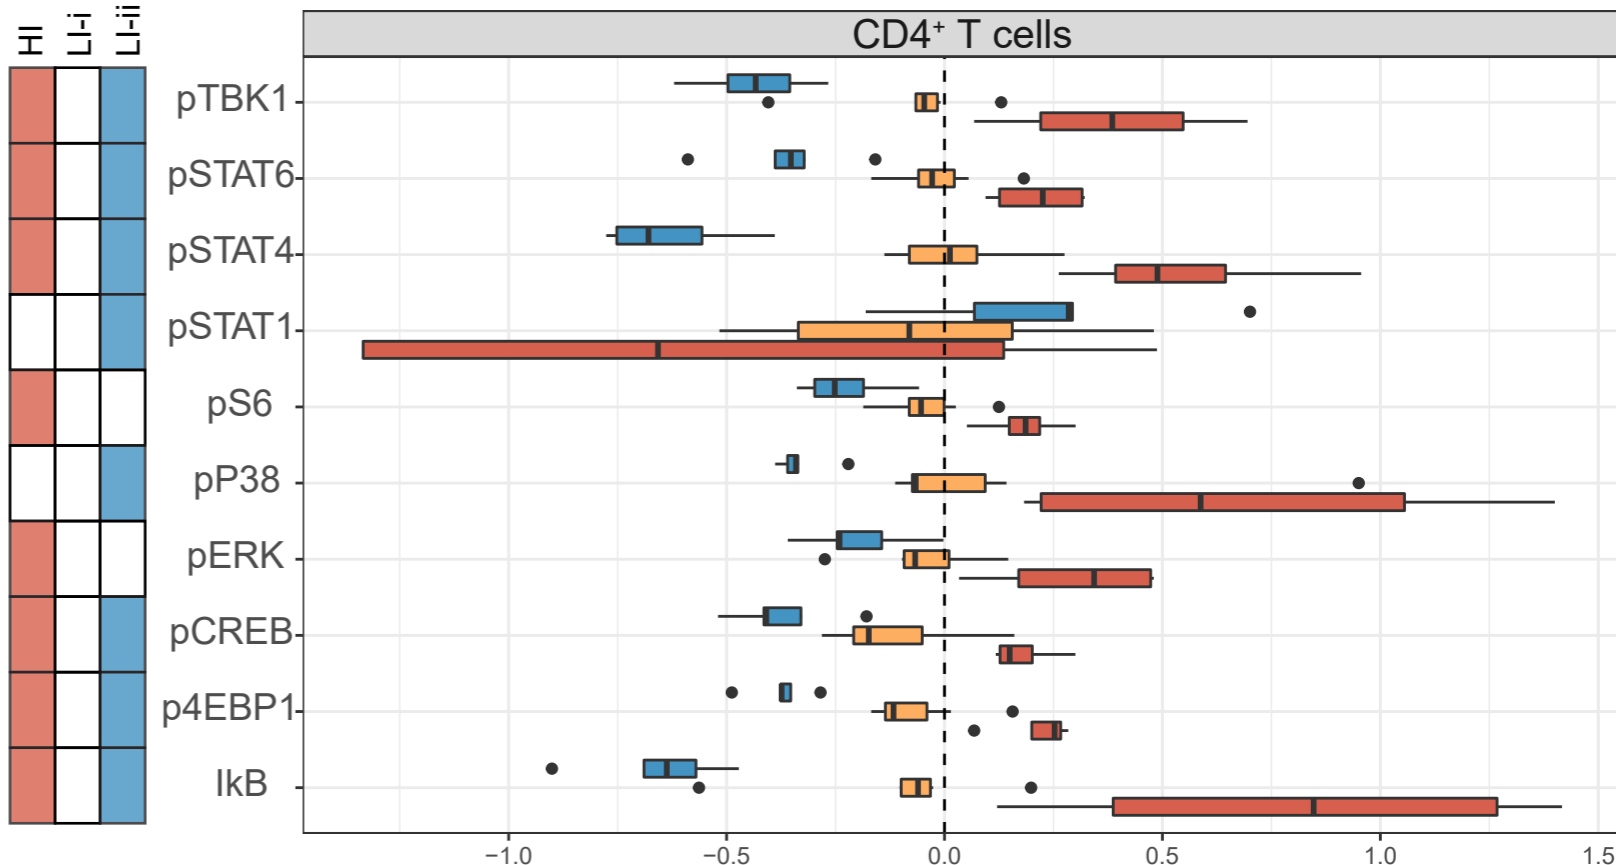

Immune Signaling Protein

Signaling Change from Week 10 to Week -3

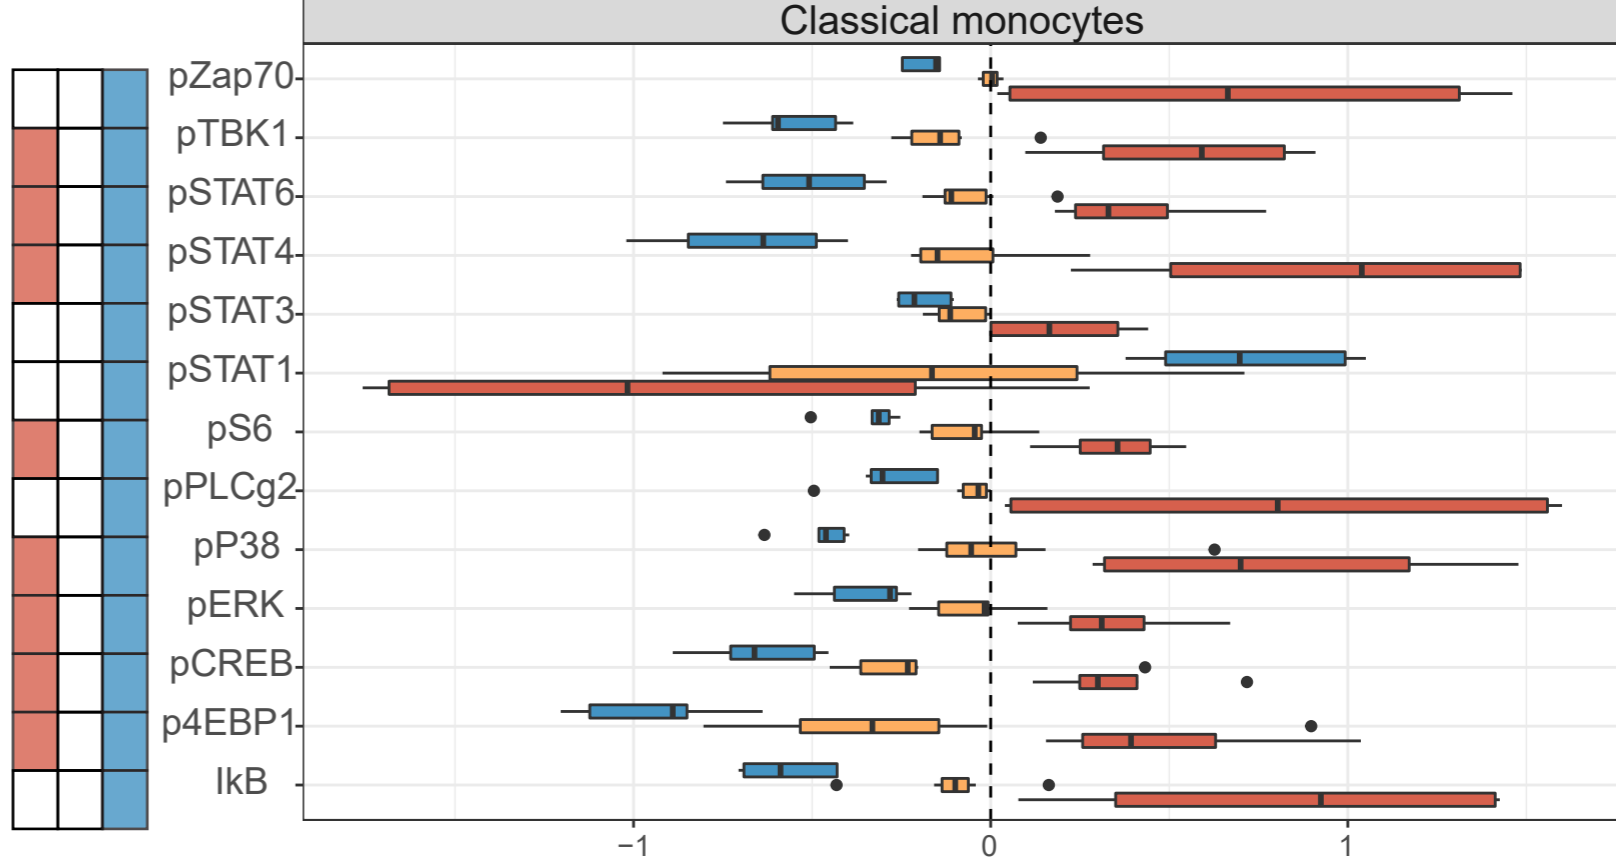

Inflammation Groups

- High-inflammation
- Low-inflammation i
- Low-inflammation ii
