# Supplementary material
Source: PubMed Central journal article supplement (PMC9020749)

Figure S5.

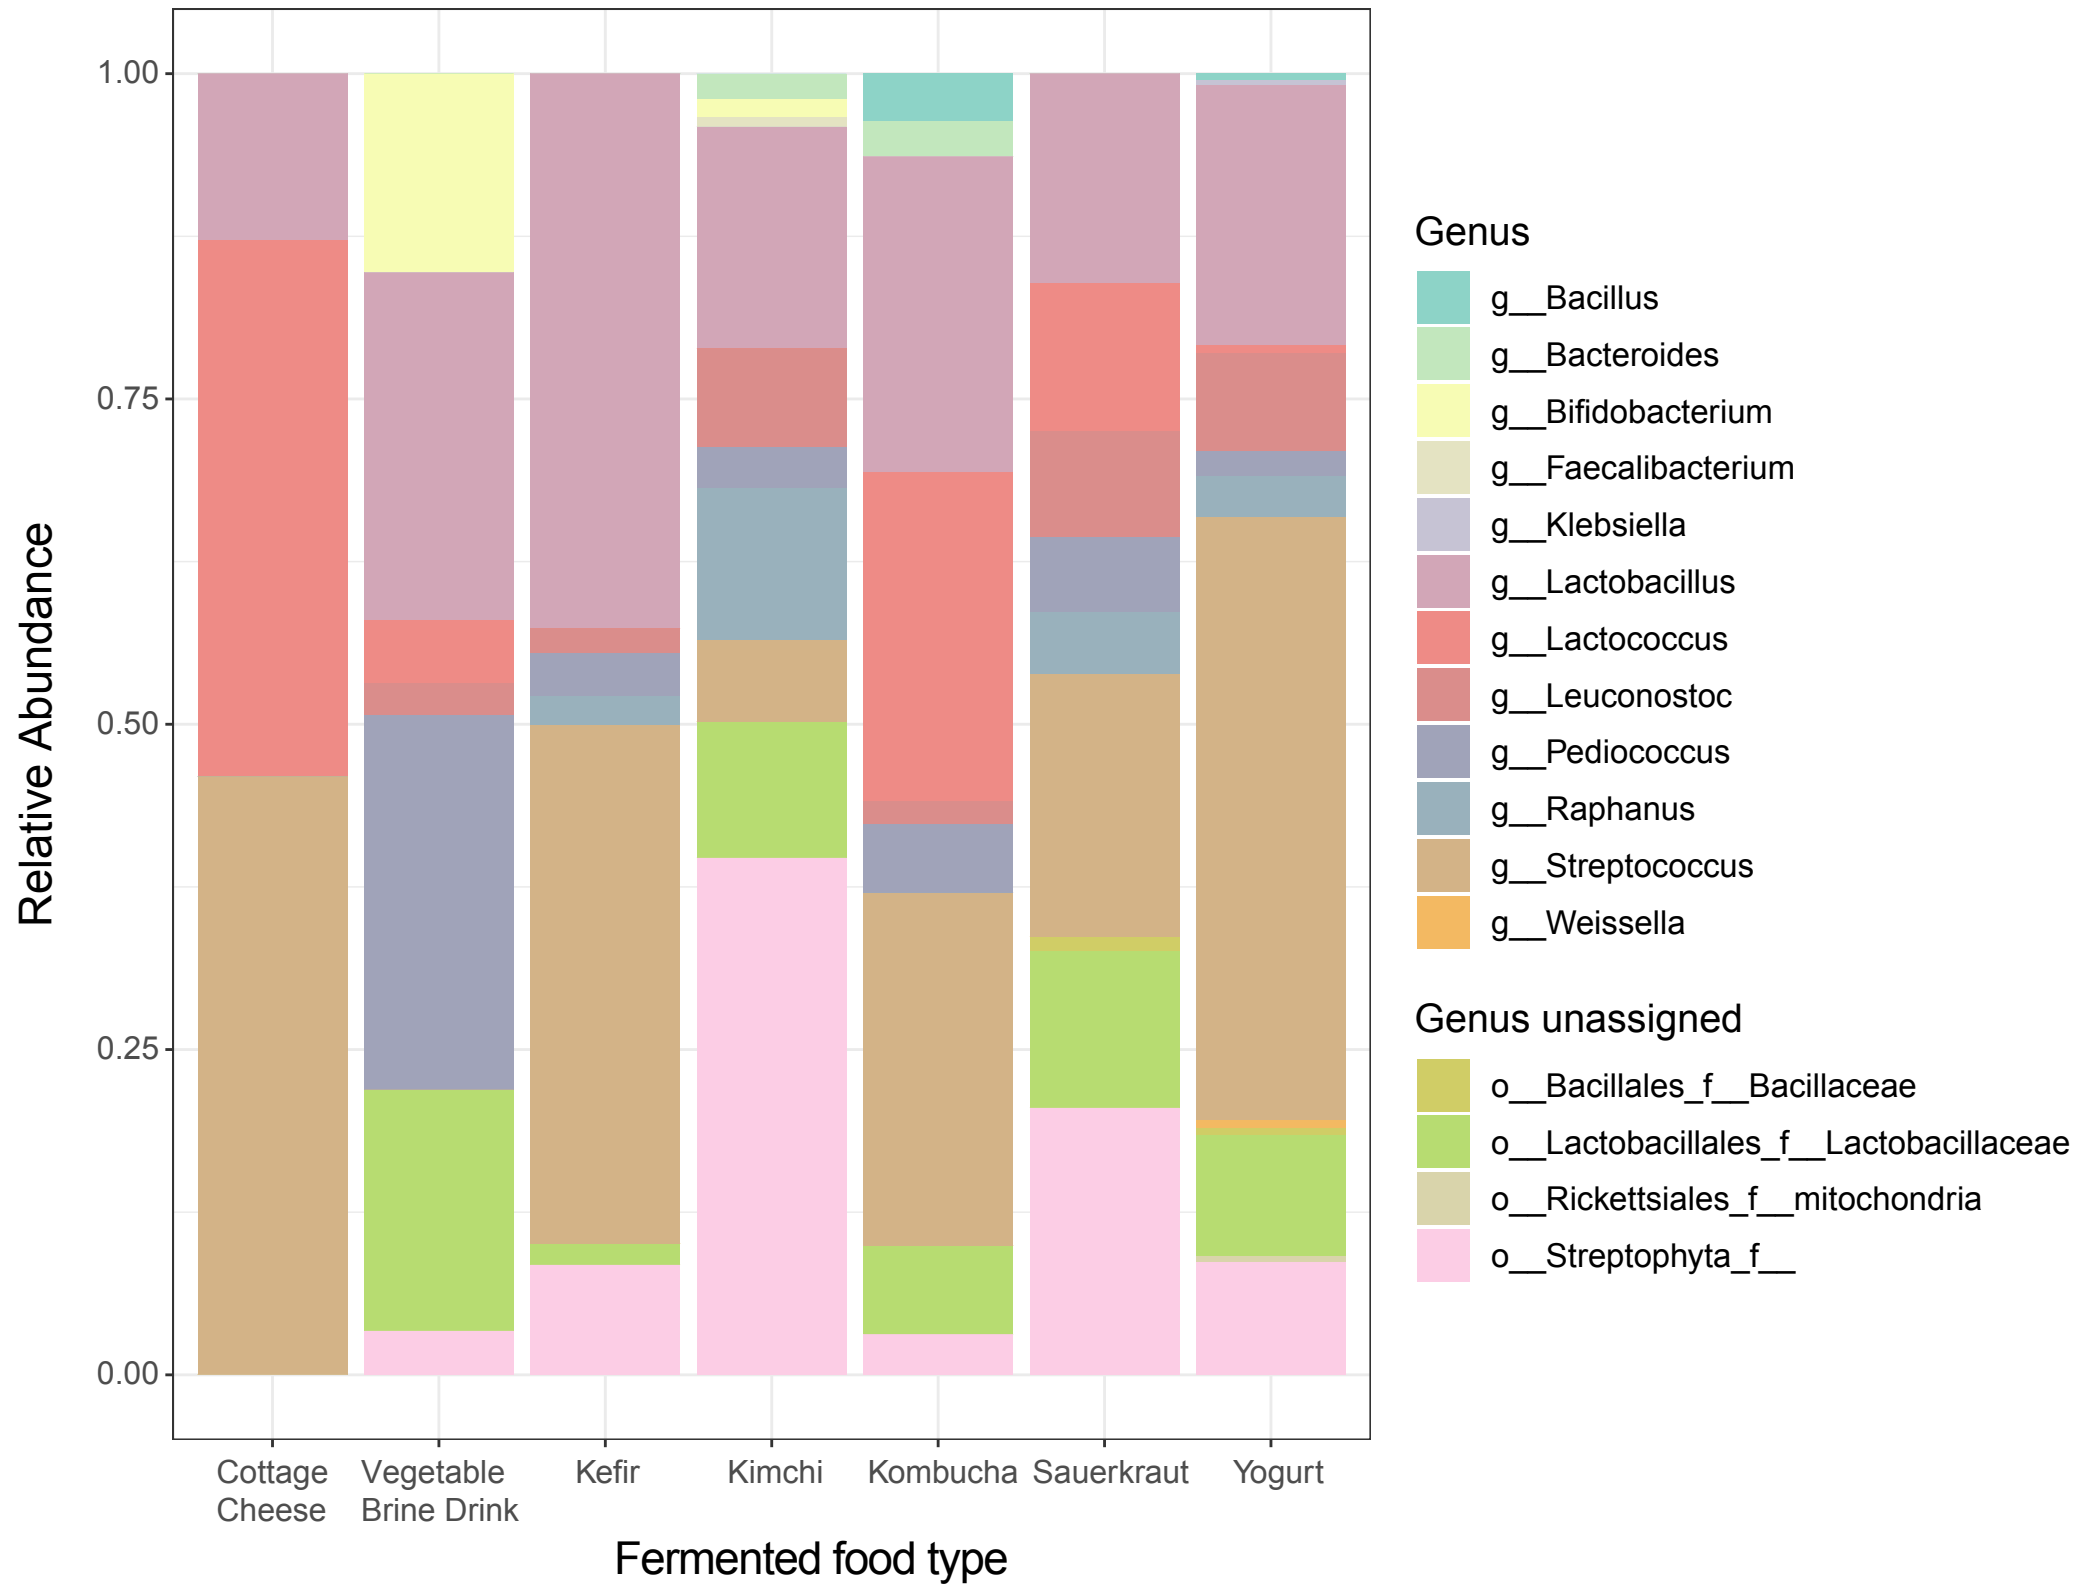

Supplement: NIHMS1722178-supplement-10.pdf [file NIHMS1722178-supplement-10.pdf]

Figure S6.

A.

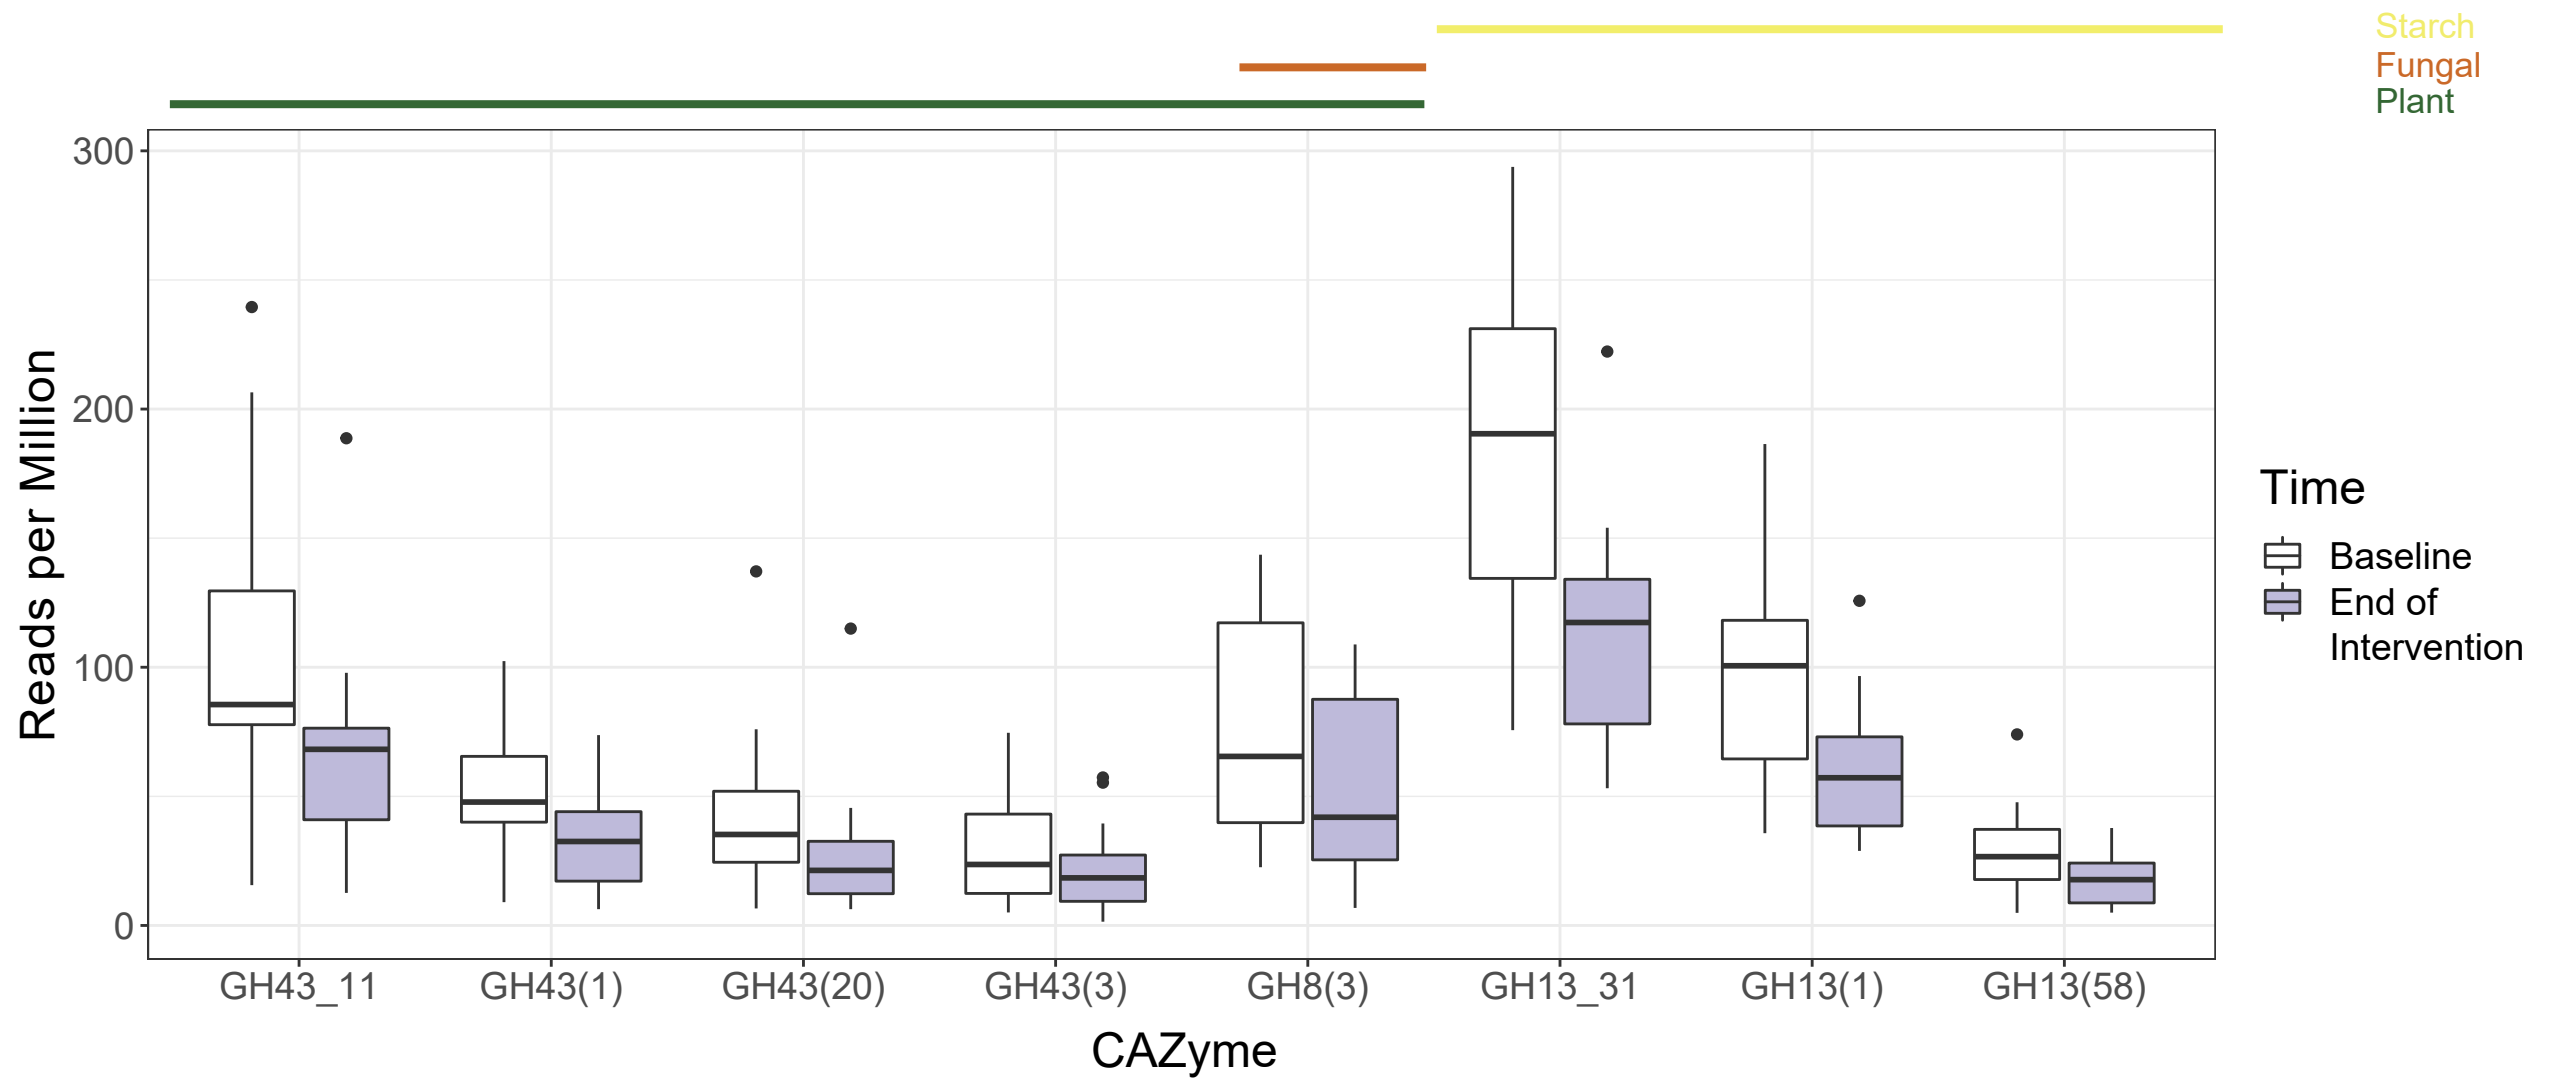

B.

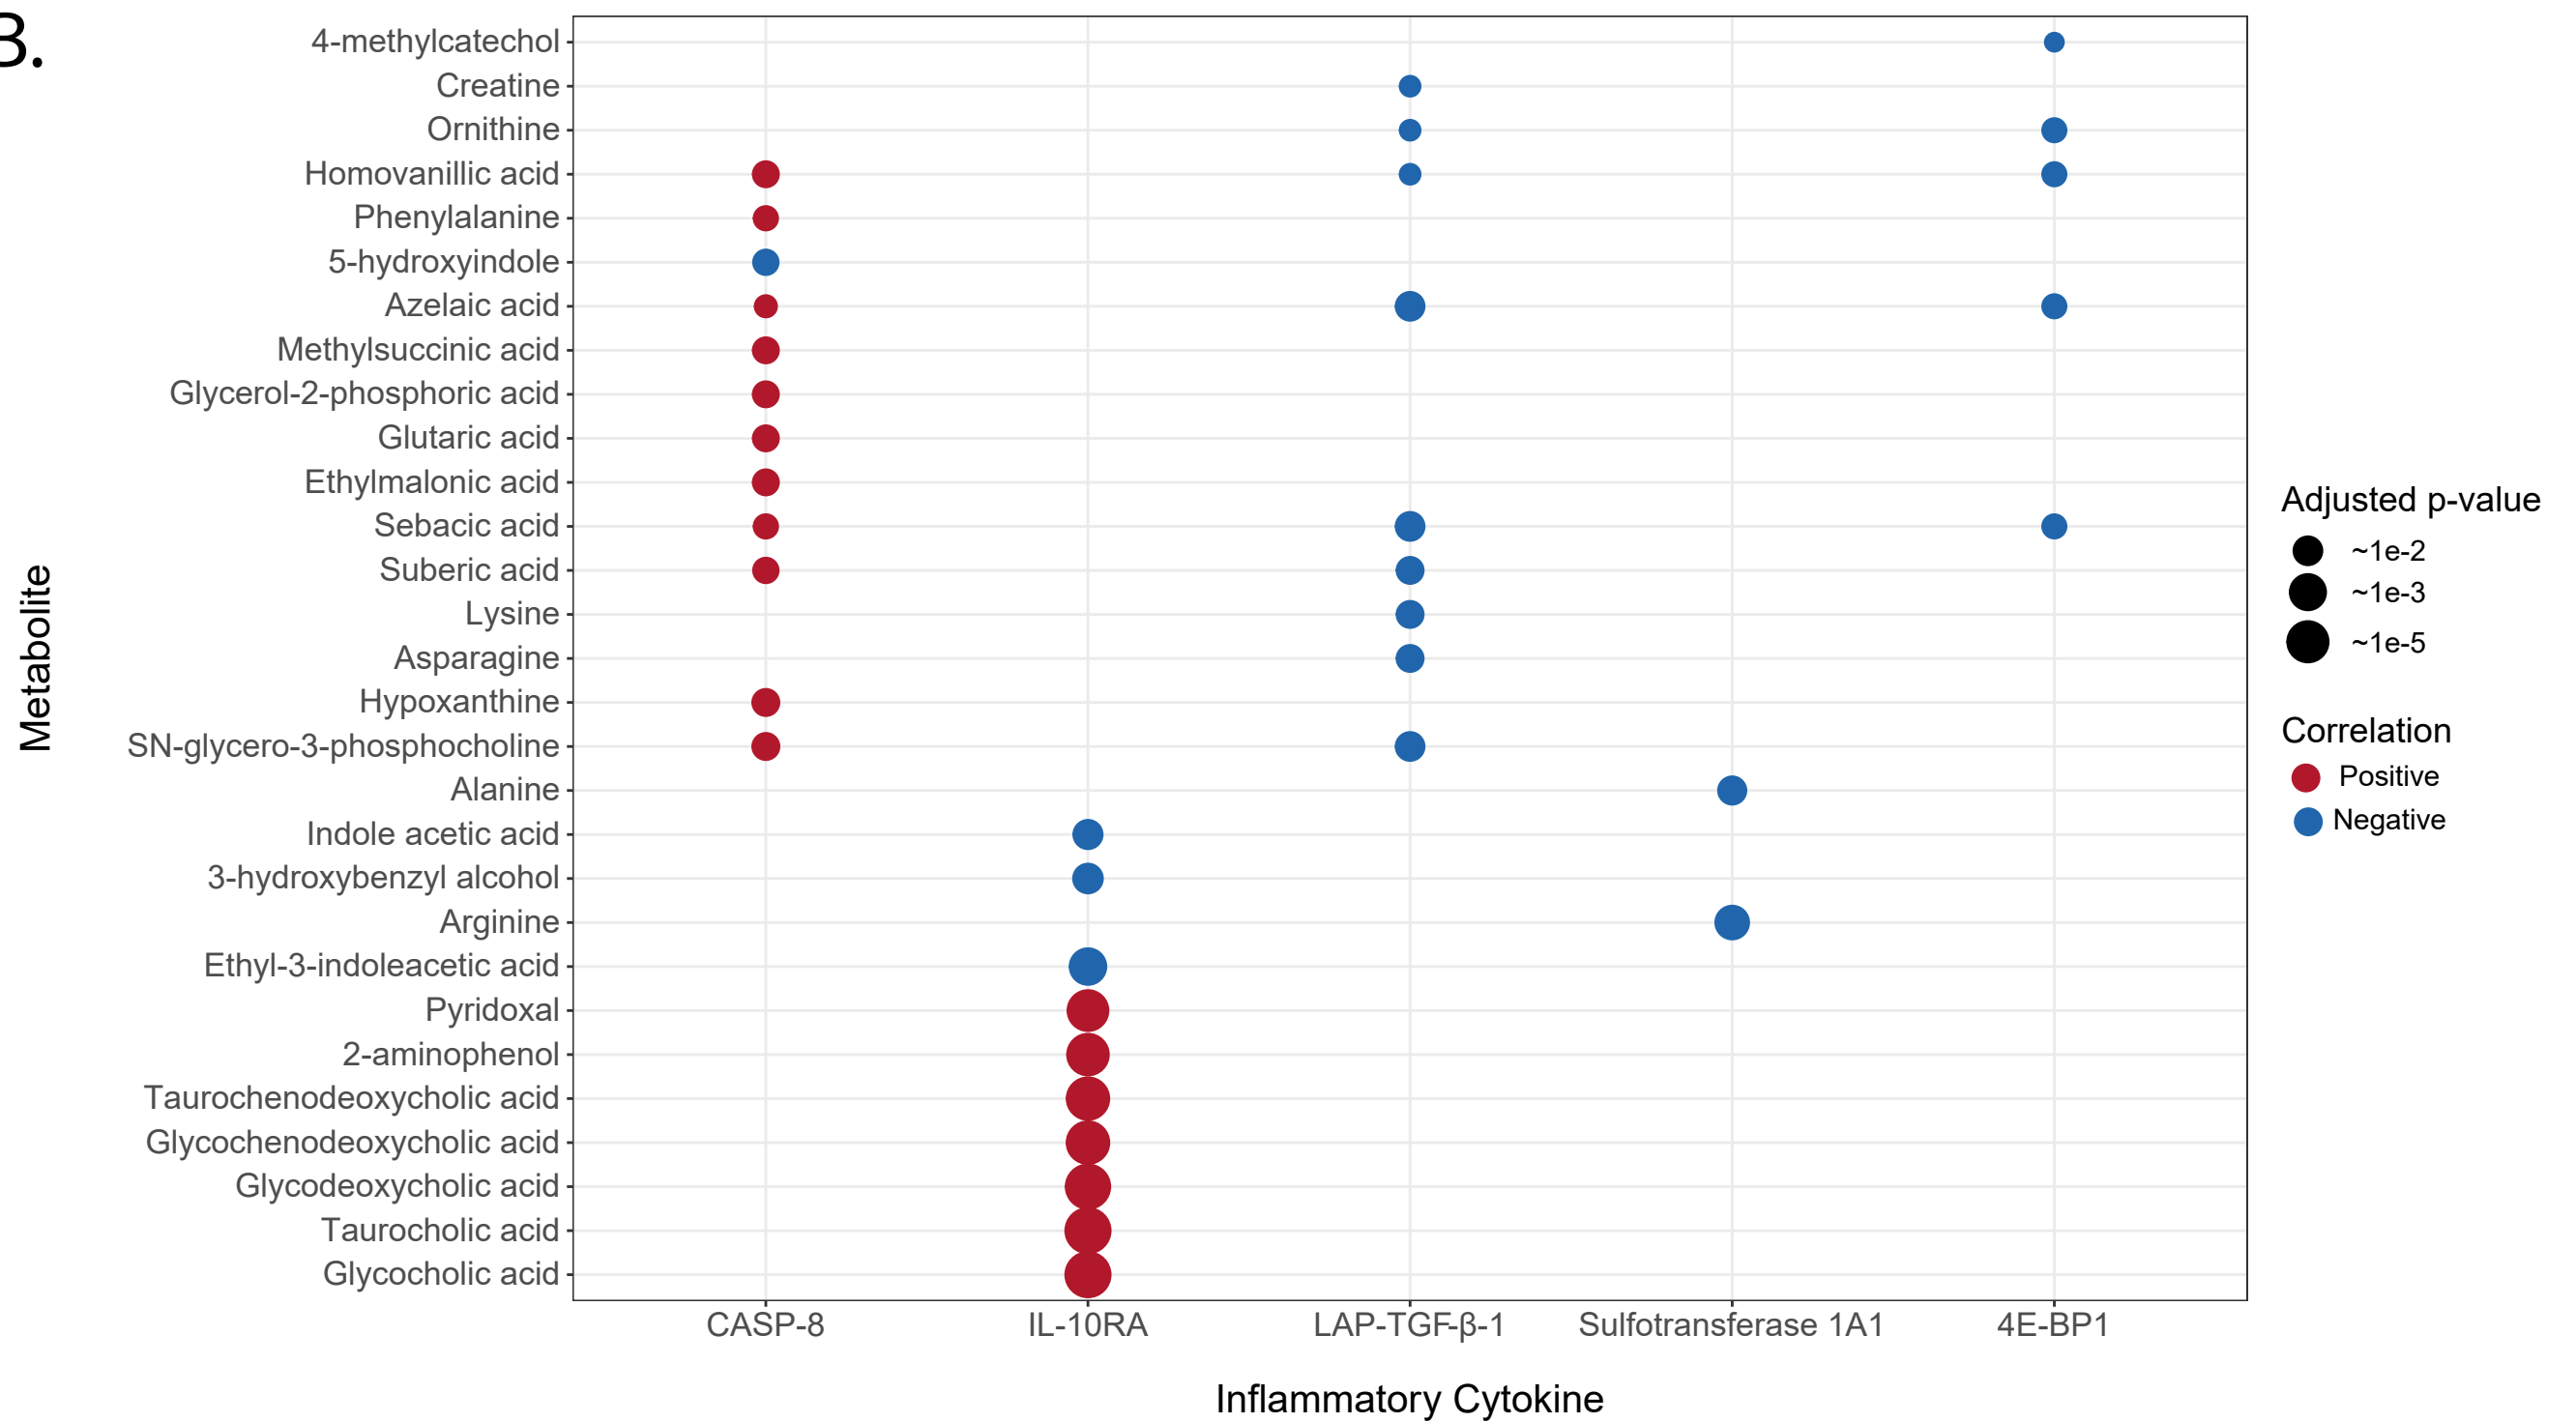

Supplement: NIHMS1722178-supplement-11.pdf [file NIHMS1722178-supplement-11.pdf]

Figure S1.

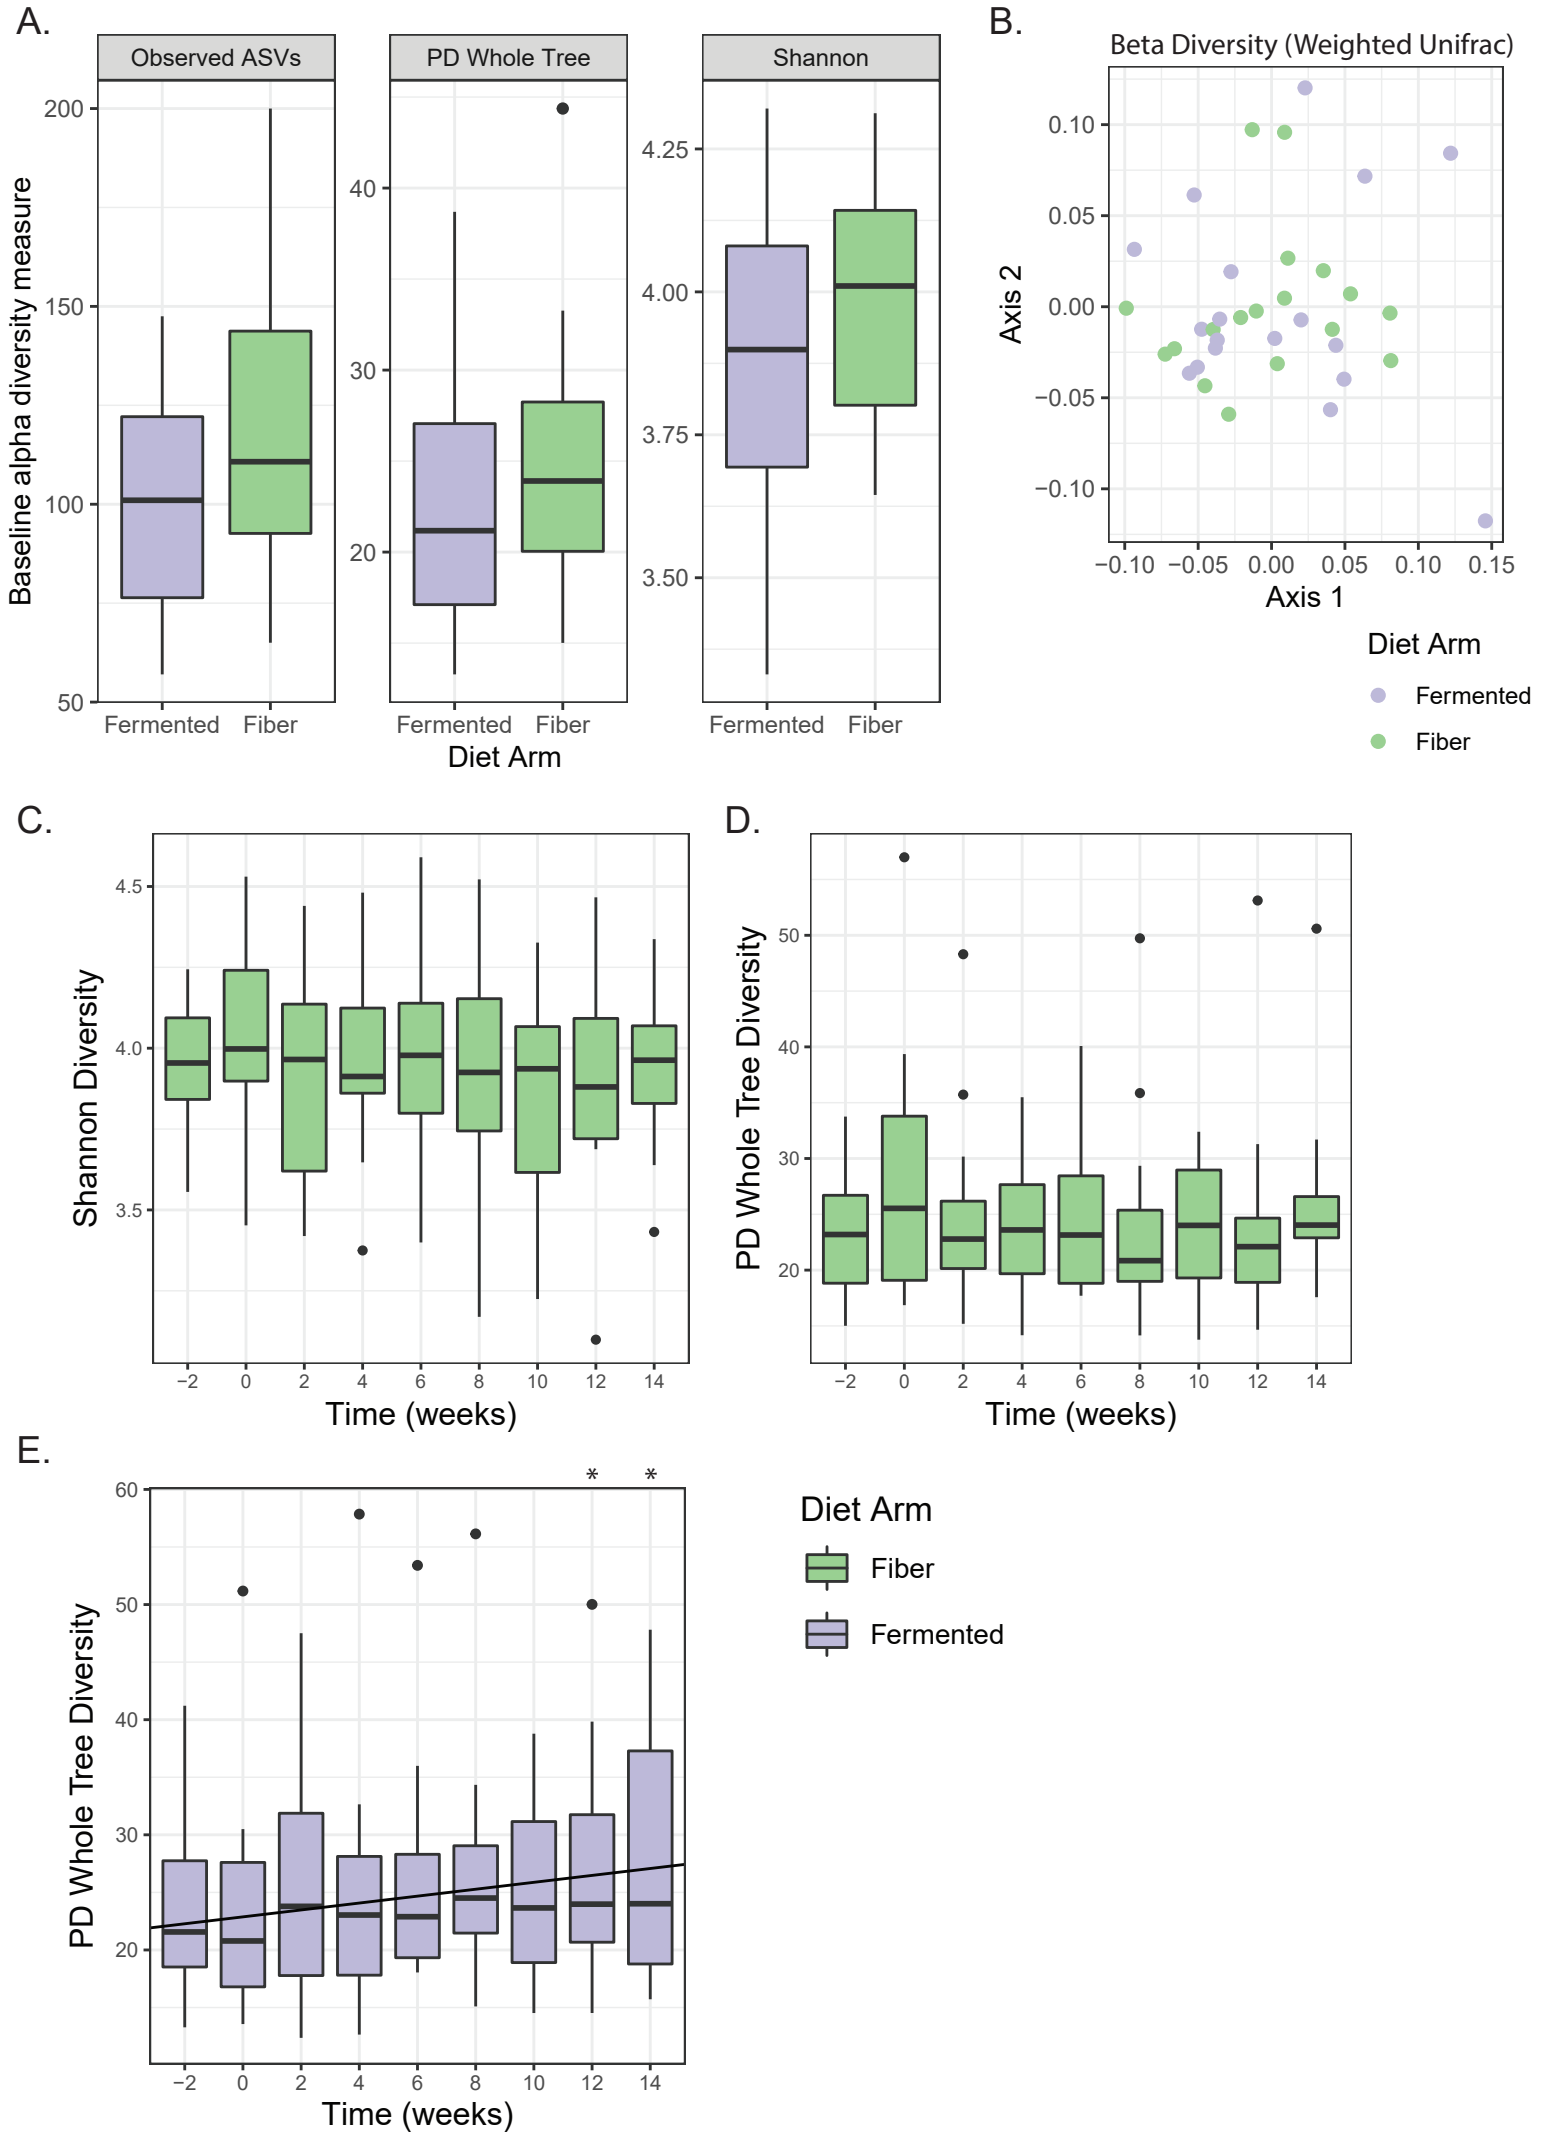

Supplement: NIHMS1722178-supplement-6.pdf [file NIHMS1722178-supplement-6.pdf]

Figure S2.

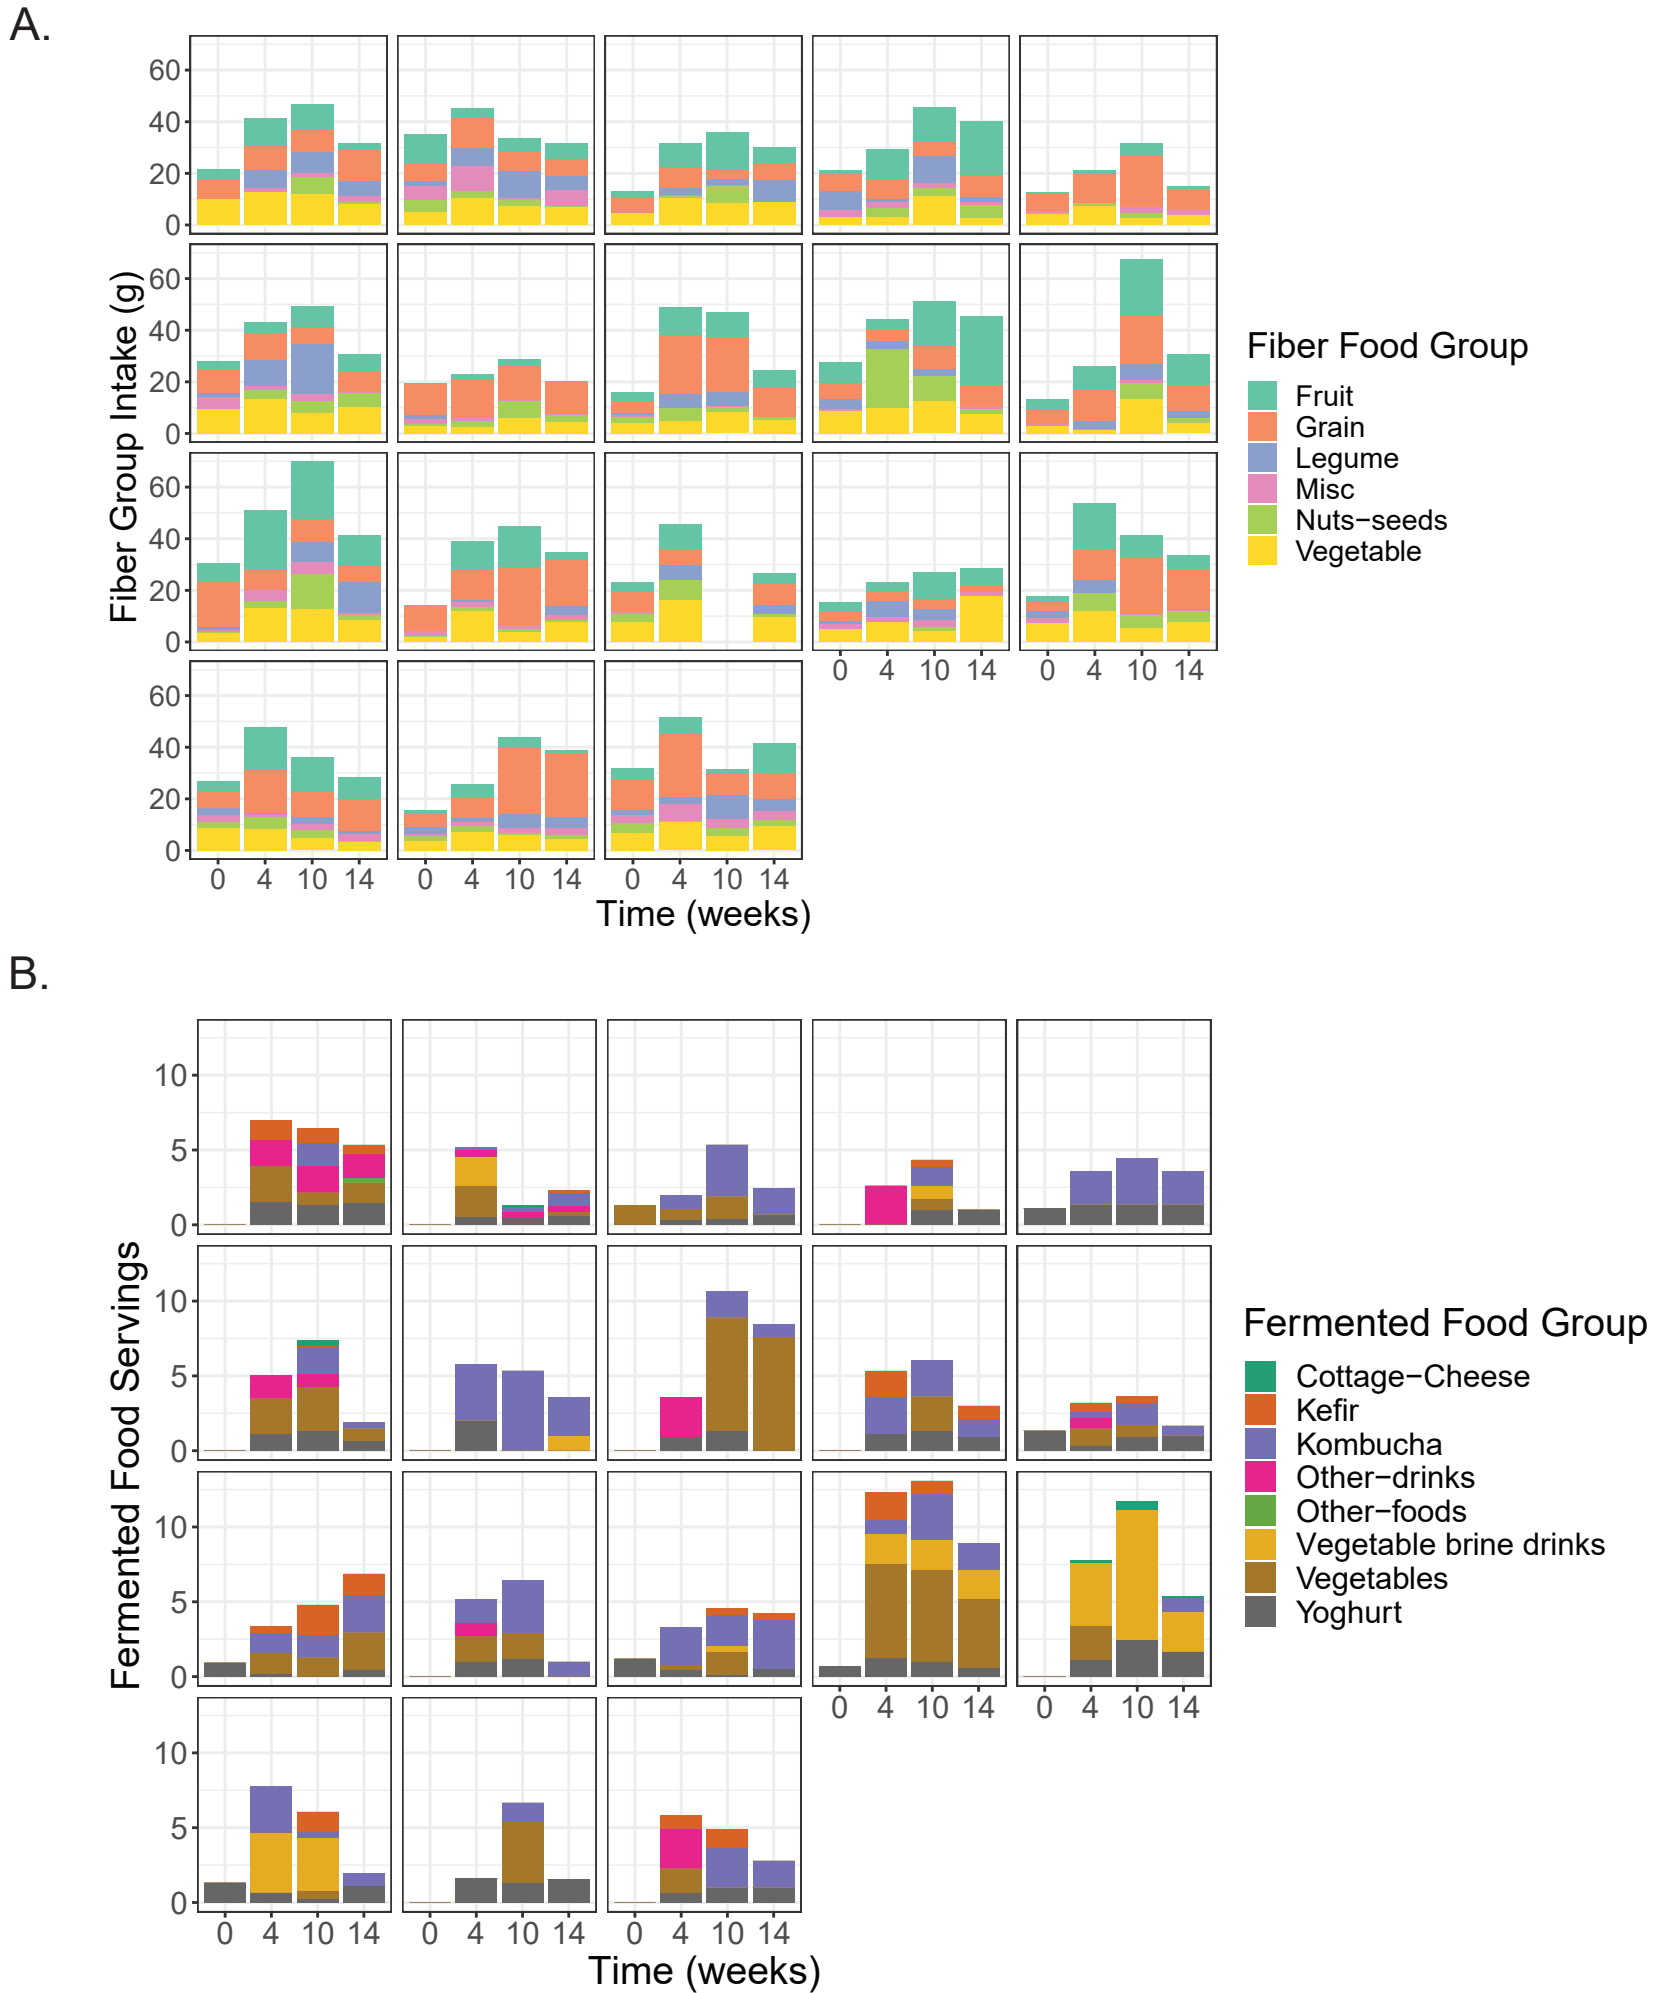

Supplement: NIHMS1722178-supplement-7.pdf [file NIHMS1722178-supplement-7.pdf]

Figure S3.

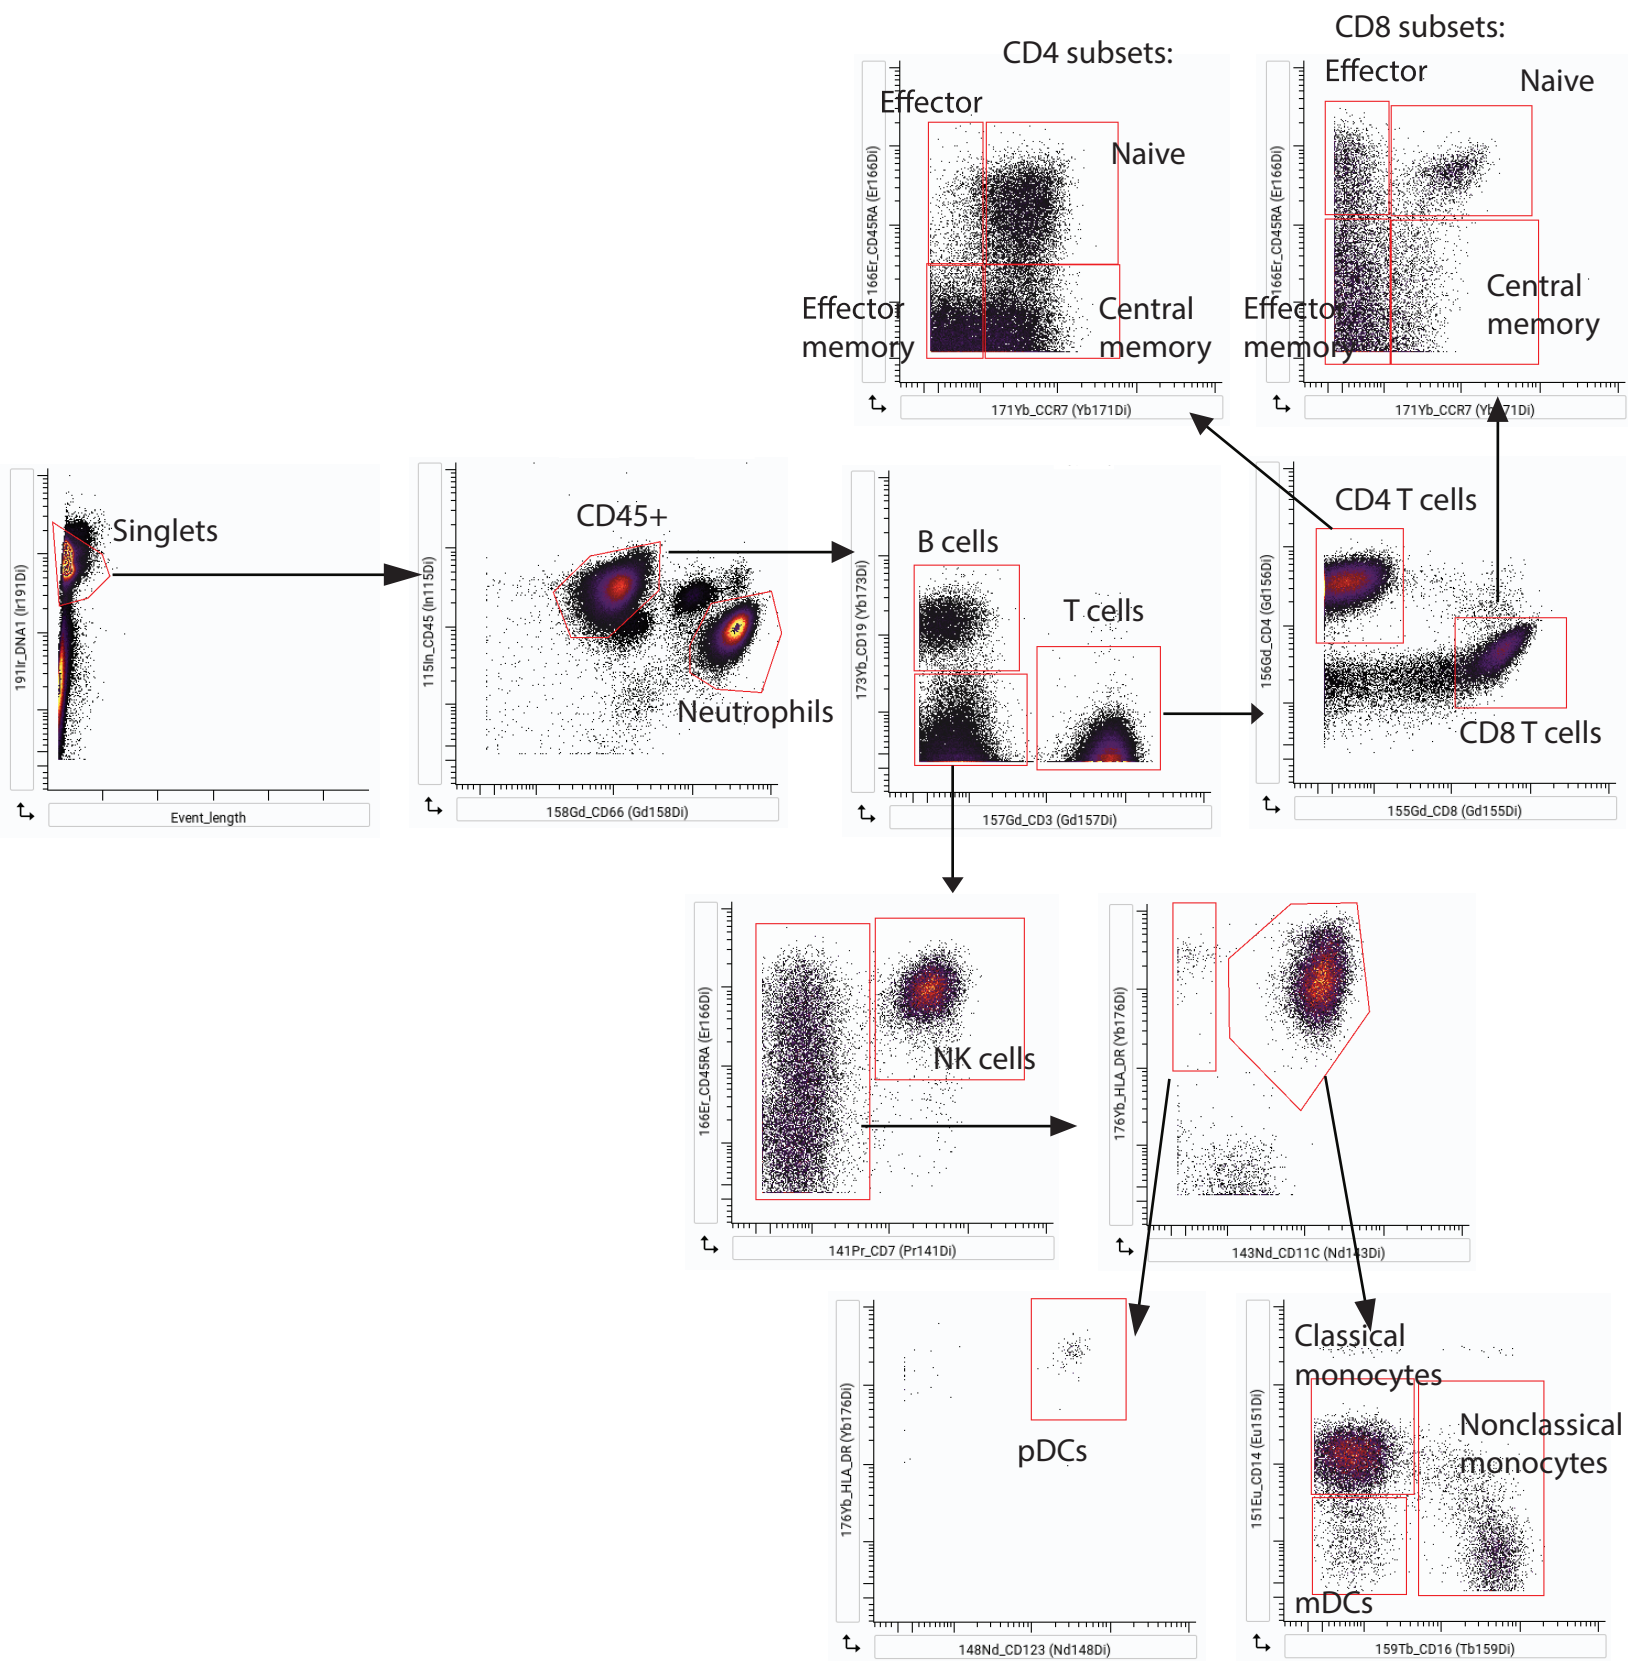

Supplement: NIHMS1722178-supplement-8.pdf [file NIHMS1722178-supplement-8.pdf]
